# Supplementary material for: Goats prefer positive human emotional facial expressions
Source: R Soc Open Sci. 2018 Aug 29;5(8):180491. doi: 10.1098/rsos.180491 (PMC6124102; doi:10.1098/rsos.180491)
Supplement: ESM raw data [file rsos180491supp1.xlsx]

## Sheet: EXPERIMENT_Trials
ID	Image gender (1=female; 2=male)	Position of positive image (1=left;2=right)	Trial	Name	Sex (1=Male, 2=Female)	Breed	First interaction (0=negative;1=positive)	Duration of interaction with neg image	No. of interactions with neg image	Duration of interaction with pos image	No. of interactions with pos image
1	1	2	1	Annie	2	Boer	0	1.2	1	1.1	1
2	1	2	1	Reggi	1	Pygmy	0	0.6	1	4.2	1
3	1	2	1	Pooky	2	Pygmy	1	0	0	1.3	1
4	1	2	1	Sandy	2	Pygmy	1	0	0	0.7	1
5	1	2	1	Sticky	1	Mix	0	3.4	1	0	0
6	1	1	1	Heidi	2	Toggenburg X Pygmy	0	1	1	5.9	1
7	1	1	1	Vern	1	British Toggenburg	0	4.2	2	3.7	2
8	1	1	1	Bernard	1	Anglo Nubian	1	0	0	1.9	1
9	1	1	1	Leo	1	Pygmy	1	0	0	0.5	1
10	1	1	1	Rupert	1	British Toggenburg	0	4.3	3	0	0
11	2	1	1	Nattie	2	British Toggenburg	1	1.1	1	7.8	1
12	2	1	1	Dingel	1	Mix	0	1.1	1	0	0
13	2	1	1	Gilbert	1	Pygmy	0	1.2	1	0	0
14	2	1	1	Marnie	2	Pygmy	0	2.3	1	0	0
15	2	1	1	Rodney	1	Pygmy	1	1.9	2	3.1	2
16	2	2	1	Wilfred	1	Anglo Nubian	1	0	0	3.7	2
17	2	2	1	Little Rupert	1	Pygmy	1	0	0	2.1	2
18	2	2	1	Diesel	1	Pygmy	0	3.2	1	0	0
19	2	2	1	Bella	2	Pygmy Mix	1	0	0	0.2	1
20	2	2	1	Maude	2	Mix	1	0.1	1	2	2
21	2	1	2	Annie	2	Boer	1	0	0	2.6	1
22	2	1	2	Reggi	1	Pygmy	0	1.1	1	0.5	1
23	2	1	2	Pooky	2	Pygmy		0	0	0	0
24	2	1	2	Sandy	2	Pygmy	0	0.6	1	0	0
25	2	1	2	Sticky	1	Mix	1	0	0	5	1
26	2	2	2	Heidi	2	Toggenburg X Pygmy	1	1	1	4.4	2
27	2	2	2	Vern	1	British Toggenburg	1	0	0	3.7	1
28	2	2	2	Bernard	1	Anglo Nubian	1	0.4	1	1.9	1
29	2	2	2	Leo	1	Pygmy		0	0	0	0
30	2	2	2	Rupert	1	British Toggenburg	1	1.5	1	2.7	1
31	1	2	2	Nattie	2	British Toggenburg	1	0.9	1	2.6	2
32	1	2	2	Dingel	1	Mix		0	0	0	0
33	1	2	2	Gilbert	1	Pygmy		0	0	0	0
34	1	2	2	Marnie	2	Pygmy	1	3.8	1	9.7	1
35	1	2	2	Rodney	1	Pygmy	1	0	0	0.3	1
36	1	1	2	Wilfred	1	Anglo Nubian		0	0	0	0
37	1	1	2	Little Rupert	1	Pygmy	0	1.4	1	0	0
38	1	1	2	Diesel	1	Pygmy		0	0	0	0
39	1	1	2	Bella	2	Pygmy Mix	1	0	0	0.2	1
40	1	1	2	Maude	2	Mix	0	1.5	1	0	0
41	1	1	3	Annie	2	Boer	0	0.8	1	0	0
42	1	1	3	Reggi	1	Pygmy	1	0	0	0.4	1
43	1	1	3	Pooky	2	Pygmy		0	0	0	0
44	1	1	3	Sandy	2	Pygmy	0	3.2	2	0.1	1
45	1	1	3	Sticky	1	Mix		0	0	0	0
46	1	2	3	Heidi	2	Toggenburg X Pygmy	1	0	0	3	1
47	1	2	3	Vern	1	British Toggenburg	1	0	0	1.7	1
48	1	2	3	Bernard	1	Anglo Nubian	1	0	0	2.5	1
49	1	2	3	Leo	1	Pygmy	0	3	1	0	0
50	1	2	3	Rupert	1	British Toggenburg	1	1.1	1	1.3	1
51	2	2	3	Nattie	2	British Toggenburg	1	0	0	8.2	2
52	2	2	3	Dingel	1	Mix	1	0.2	1	1.7	2
53	2	2	3	Gilbert	1	Pygmy		0	0	0	0
54	2	2	3	Marnie	2	Pygmy	0	1.8	1	0	0
55	2	2	3	Rodney	1	Pygmy	1	0	0	2.2	1
56	2	1	3	Wilfred	1	Anglo Nubian	0	2.2	1	0	0
57	2	1	3	Little Rupert	1	Pygmy	0	0.6	1	0	0
58	2	1	3	Diesel	1	Pygmy	0	0.3	1	0	0
59	2	1	3	Bella	2	Pygmy Mix		0	0	0	0
60	2	1	3	Maude	2	Mix	0	1.5	2	0	0
61	2	2	4	Annie	2	Boer	1	0	0	1.6	2
62	2	2	4	Reggi	1	Pygmy		0	0	0	0
63	2	2	4	Pooky	2	Pygmy		0	0	0	0
64	2	2	4	Sandy	2	Pygmy	1	0	0	1.6	1
65	2	2	4	Sticky	1	Mix	1	4.2	1	3.3	1
66	2	1	4	Heidi	2	Toggenburg X Pygmy	0	3.1	1	0	0
67	2	1	4	Vern	1	British Toggenburg	1	0	0	0.2	1
68	2	1	4	Bernard	1	Anglo Nubian	1	0	0	2.8	1
69	2	1	4	Leo	1	Pygmy		0	0	0	0
70	2	1	4	Rupert	1	British Toggenburg	1	3.7	2	0.3	1
71	1	1	4	Nattie	2	British Toggenburg	1	8	2	1	2
72	1	1	4	Dingel	1	Mix	1	1.7	2	0.3	1
73	1	1	4	Gilbert	1	Pygmy		0	0	0	0
74	1	1	4	Marnie	2	Pygmy	1	0	0	1.5	1
75	1	1	4	Rodney	1	Pygmy	0	0.3	1	0	0
76	1	2	4	Wilfred	1	Anglo Nubian	1	3.1	2	0.6	1
77	1	2	4	Little Rupert	1	Pygmy		0	0	0	0
78	1	2	4	Diesel	1	Pygmy	1	0	0	1.6	1
79	1	2	4	Bella	2	Pygmy Mix	1	0	0	1.5	1
80	1	2	4	Maude	2	Mix	1	0	0	1.3	1
